# Supplementary material
Source: publisher figshare collection journal article supplement (https://aacr.figshare.com/articles/dataset/_/22413603)
Supplement: Supplementary file 1 [file 39859623]

**Supplemental Table 1. Primers sequences used for this study**

| <b>Gene</b>   | <b>Forward Sequence (5'-3')</b> | <b>Reverse Sequence (5'-3')</b> |
|---------------|---------------------------------|---------------------------------|
| <i>BRD2</i>   | CTACGTAAGAAACCCCGGAAG           | GCTTTTTCTCCAAAGCCAGTT           |
| <i>BRD3</i>   | CCTCAGGGAGATGCTATCCA            | ATGTCGTGGTAGTCGTGCAG            |
| <i>BRD4</i>   | TTTGAGACCCTGAAGCCGTC            | TTAGGCAGGACCTGTTTCGG            |
| <i>JAG1</i>   | CTATGATGAGGGGGATGCT             | CGTCCATT CAGGCACTGG             |
| <i>ACTB</i>   | ATTGGCAATGAGCGGTTCC             | GGTAGTTTCGTGGATGCCACA           |
| <i>POLR2A</i> | ACTTTTGGTACATTGTGGCTTCAA        | CCGCCAGGACAAACCAGTAT            |

The Supplement Table 1 lists the qPCR primers used in this study.

**Supplemental Table 2. ChIP primers sequences used for this study**

| <b>Region</b>             | <b>Forward Sequence (5'-3')</b> | <b>Reverse Sequence (5'-3')</b> |
|---------------------------|---------------------------------|---------------------------------|
| Jagged1 proximal promoter | AGCAGCGTCTGCCAGGT               | TGACTGAGCGGTCCGAGC              |
| Jagged1 distal promoter   | GGAGACTGGTGTGATGGA              | GAGCAAGTTTACAGCTGGT             |

The Supplement Table 2 lists the ChIP primers used in this study.
